# Supplementary material for: Rspo2 inhibits TCF3 phosphorylation to antagonize Wnt signaling during vertebrate anteroposterior axis specification
Source: PubMed Central journal article supplement (PMC8239024; doi:10.1038/s41598-021-92824-6), 2021-06-28
Supplement: 41598_2021_92824_MOESM1_ESM.pdf [file 41598_2021_92824_MOESM1_ESM.pdf]

## **Rspo2 inhibits TCF3 phosphorylation to antagonize Wnt signaling during vertebrate anteroposterior axis specification.**

Alice H. Reis and Sergei Y. Sokol

### **Supplementary Information:**

#### **Supplementary Figure legends**

##### **Supplementary Fig. 1: Genes upregulated by Rspo2 in ectoderm explants.**

Top gene targets encoding transcription factors differentially expressed at stage 10 are shown. Four-cell embryos were injected with 0.5 ng of Rspo2 RNA into animal blastomeres. Ectoderm explants were prepared from injected embryos at stage 9, RNA was isolated at stage 10 for RNA-sequencing. Human gene symbols are shown, except for those that are *Xenopus*-specific (\*). Target genes of the injected animal caps have been normalized to the uninjected controls.

##### **Supplementary Fig. 2: Rspo2 constructs with compromised binding of**

**ZNRF3/RNF43 and LGR4/5 retain the anteriorizing activity.** A, Point mutant constructs generated from Rspo2 and Rspo $\Delta$ T. B-E, Cement gland enlargement (dashed white line) caused by Rspo2 RNA injection. Ventral animal blastomeres of four-cell embryos were injected with 500 pg of Rspo2, R65A, Q70A, F105A or F109A mRNA. G-I, Anteriorized phenotypes caused by injection of Rspo $\Delta$ T, Rspo $\Delta$ T-R65A, Rspo $\Delta$ T-Q70A, Rspo $\Delta$ T-F105A $\Delta$ T or Rspo $\Delta$ T-F109A mRNA (500 pg each). Imaging was done at stages 28-32. F, M, Quantification of the

embryos showing enlarged cement gland after overexpression of different Rspo2 constructs. Numbers of embryos per group are shown on the top of each bar. N, levels of expression for Rspo2 and different Rspo $\Delta$ T derivatives in the same experiment. Lysates from the injected embryos at stages 11/12 were immunoblotted and probed with anti-Flag antibody. ERK serves as a control for loading.

**Supplementary Fig. 3: Rspo2 inhibits Wnt target genes in ectoderm**

**explants.** Wnt target gene expression in ectoderm explants at stage 13.

Embryos were injected into four animal blastomeres with Wnt8 DNA (50 pg) and Rspo2 RNA (0.5 ng). RT-qPCR analysis was carried out in triplicates for *myod1* and *msgn1*.

**Supplementary Fig. 4. Comparison of the anteriorizing activity of Rspo2**

**constructs.** Ventral animal blastomeres of four-cell embryos were injected with 500 pg of RNA encoding Rspo2 deletion mutants. Embryo images, representative of three independent experiments, are shown. The ratio of the number of anteriorized embryos to the total number of injected embryos is indicated. A, Control embryo at stage 27. B-D, the sibling embryos injected with RNAs encoding full-length Rspo2 (B), Rspo $\Delta$ F (C), Rspo $\Delta$ T (D).

**Supplementary Tables 1-2.**

**Supplementary Table 1.** Quantification of data for wholemount in situ

hybridization shown in representative images of Figure 1E-J. Numbers of embryos with indicated changes in gene expression are indicated.

**Supplementary Table 2.** Primer sequences for the site-directed mutagenesis and RT-qPCR.

Suppl. Fig.1

| Top genes upregulated by Rspo2 |                                              |             |
|--------------------------------|----------------------------------------------|-------------|
| Human symbol                   | log <sub>2</sub> (Fold_change)<br>normalized | p-value     |
| OTX2                           | 5,20                                         | 1,0882E-147 |
| TCF24                          | 4,70                                         | 0,00023719  |
| CRX/otx5*                      | 3,98                                         | 2,7623E-183 |
| GBX2                           | 3,80                                         | 0,010773101 |
| ZIC3                           | 3,61                                         | 4,00229E-35 |
| NKX2-8                         | 3,46                                         | 0,002037888 |
| KLF5                           | 3,46                                         | 0,002037888 |
| hes3.L*                        | 3,32                                         | 0,040847184 |
| hes5.1.L*                      | 3,32                                         | 0,003825822 |
| NFKB1                          | 3,32                                         | 0,040847184 |





# Suppl. Fig 3

## A

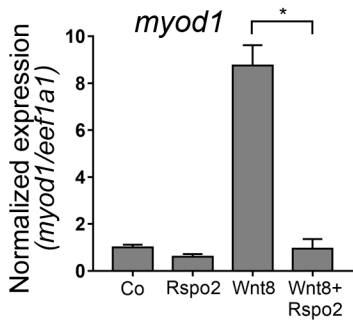

## B

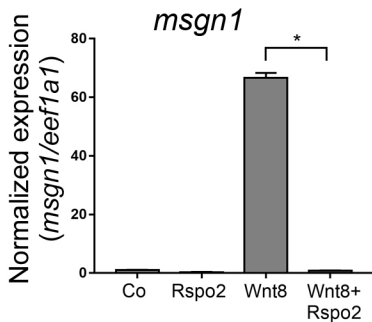

# Suppl Fig. 4

A

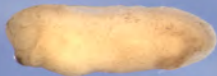

Control

30/30

B

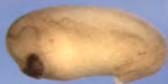

Rspo2

28/34

C

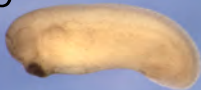

Rspo $\Delta$ F

24/30

D

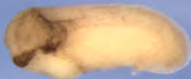

Rspo $\Delta$ T

26/30

Suppl. Figure 5, relevant to Figure 3, Figure 4, Figure 5 and Supplementary Figure 2.  
Original blots are shown, with the lanes included in Main Figures in red boxes.

**Figure 3D** (Lanes 1-4 are not relevant and not included in the main figure)

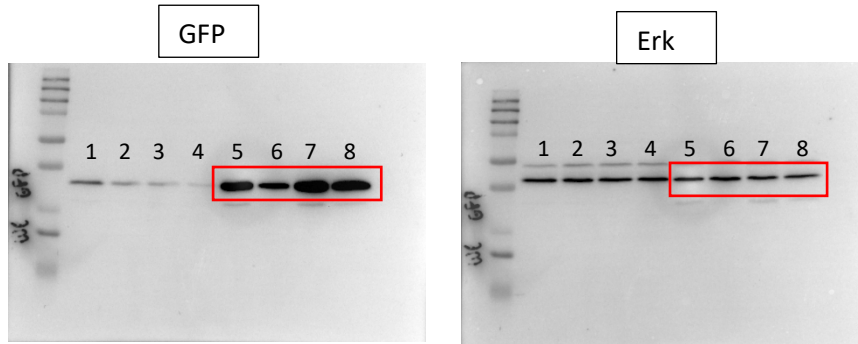

**Figure 3E** (Lanes 5 and 8 are not relevant and have not been included in the main figure)

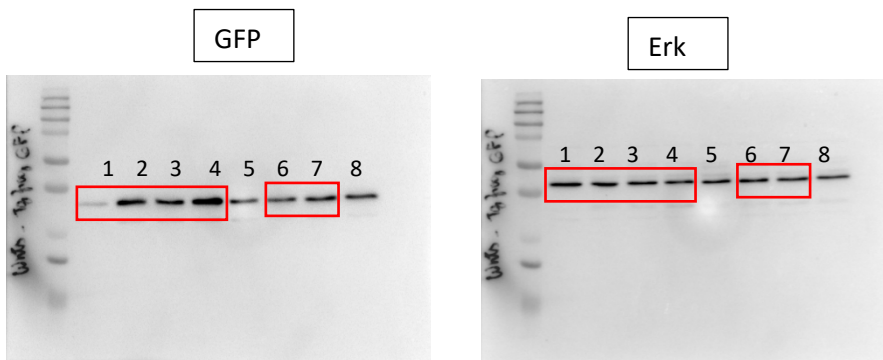

**Figure 4B**

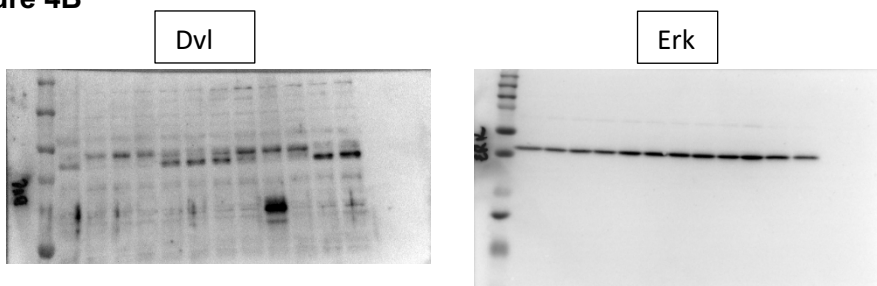

**Figure 4C** (the last lane is not relevant to the experiment and not shown in the main figure).

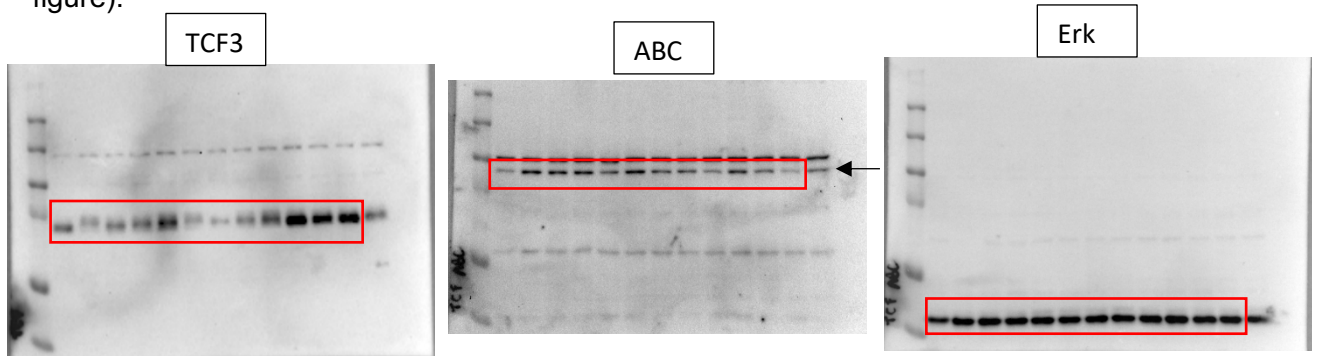

**Figure 4D** (lanes 3,4,8,9 are not relevant to the experiment and not included in the main figure).

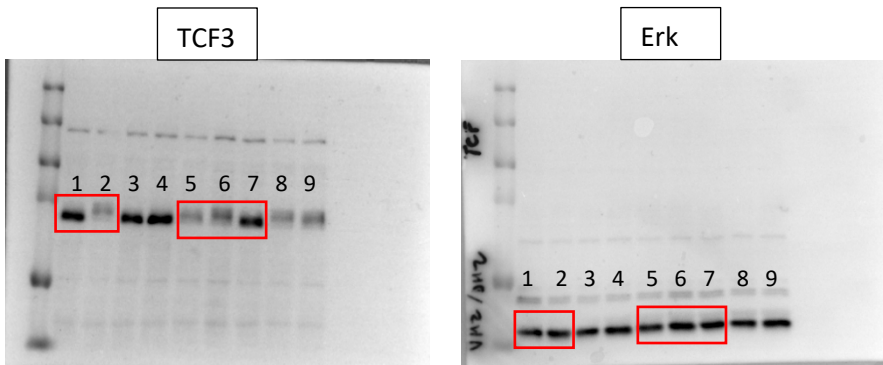

**Figure 4E**

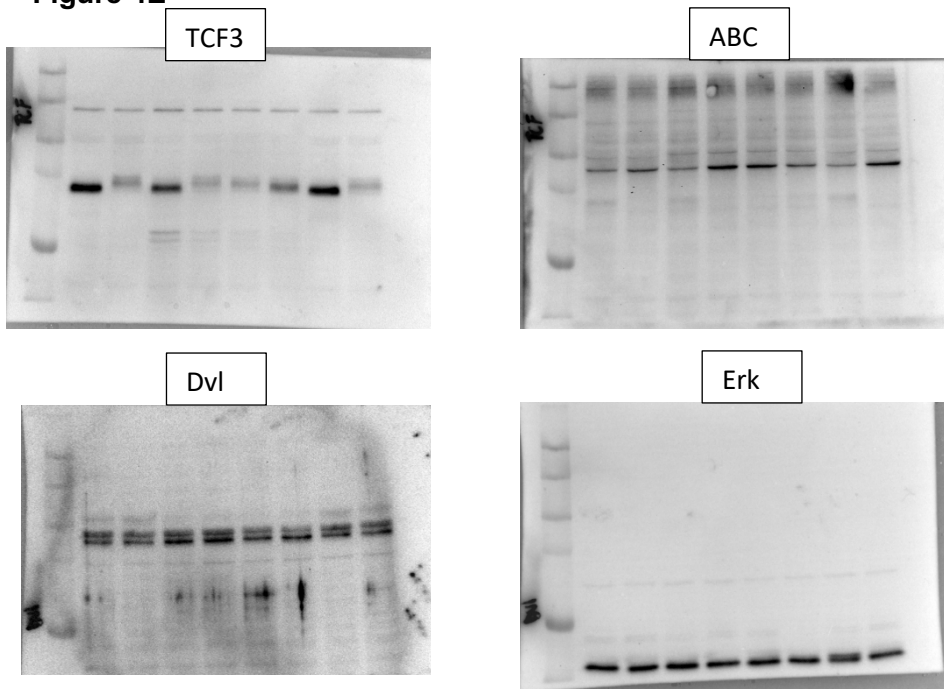

**Figure 5C**

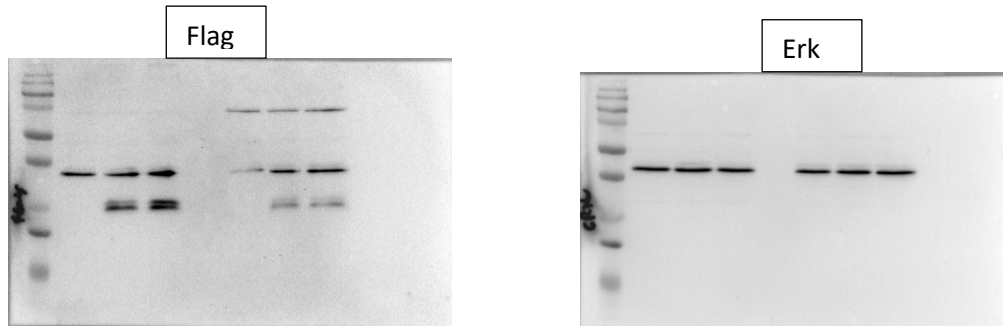

**Supplementary Figure 2.**

Lanes 1 and 2 have been rerun and shown at higher exposure and lane 3 is not relevant and not included.

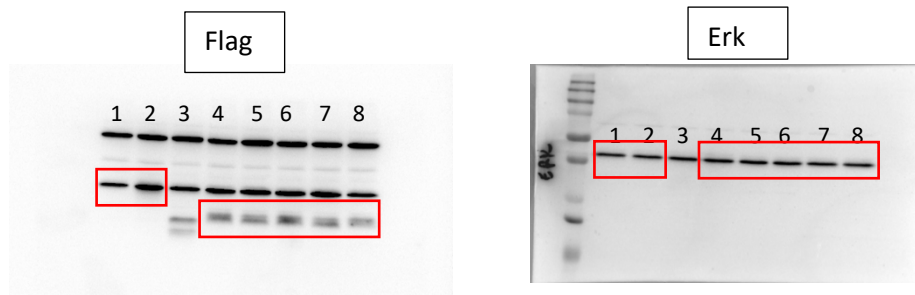

## Supplementary Table 1

Quantification of wholemount *in situ* hybridization analysis in embryos with modulated Rspo2 levels

|                       | Control | Rspo2 RNA | RMO <sup>ATG</sup> |
|-----------------------|---------|-----------|--------------------|
| <b><i>krt12.4</i></b> |         |           |                    |
| Increased             | 0       | 0         | 13                 |
| Decreased             | 0       | 7         | 0                  |
| Unchanged             | 30      | 3         | 4                  |
| <b><i>foxg1</i></b>   |         |           |                    |
| Increased             | 0       | 5         | 0                  |
| Decreased             | 0       | 0         | 12                 |
| Unchanged             | 22      | 7         | 3                  |
| <b><i>cdx4</i></b>    |         |           |                    |
| Increased             | 3       | 0         | 12                 |
| Decreased             | 0       | 7         | 0                  |
| Unchanged             | 19      | 5         | 3                  |

## Supplementary Table 2.

### Primers for *Rspo2* mutagenesis

*Rspo*ΔF:

5'- AGACGGAGCAAGAGAGCCAGATCTCCATTGGATGACACCATG-3'

*Rspo*ΔT:

5' -TGC GTGGATGGCTGTGAAGCTAGCGGAGGAACAAGAACCACA-3'

R65A:

5'- ACTGTTTTTCTATCTGCGCGCAGAAGGTATGAGGCAGTAT-3'

Q70A:

5'-CGAAGAGAAGGTATGAGGGCATATGGAGAGTGTCTGCAG-3'

F105A:

5'-GAAAATTGTGACTCTTGTGCATGCCGAGATTTTTGCATAA-3'

F109A:

5'-TCTTGT TTTAGCCGAGATGCATGCATAAAGTGCAAATCT-3'

### Primers for RT-qPCR

*otx2.L*: F: 5'-GGATGGATTTGTTACATCCGTC-3'

R: 5'-CACTCTCCGAGCTCACTTCCC-3'

*ag1.S*: F: 5'-GGTGCTGCCAAGTCTGAGC-3'

R: 5'-GCCAGTTTCTGTGCCATTTTGTCA-3'

*krt12.4.L*: F: 5'-CACCAGAACACAGAGTAC-3'

R: 5'-CAACCTTCCCATCAACCA-3'

*cdx4.L*: F: 5'-TGATTTATCACCTAACCAG-3'

R: 5'-GTCCCAGATGGATGAGGAGA

*msgn1.L*: F: 5'-GTATCCAACACTTTGCCATG-3'

R: 5'-AGCACTGGAGAAGGTTTGTG-3'

*axin-2-like*: F: 5'-GGCTGGTCTCTCTGCCTCTT-3'

R: 5'-TGTCCTTCTCCTCCTGCTTCT-3'

*eef1a1.S*: F: 5'-ACCCTCCTCTTGGTCGTTTT-3'

R: 5'-TTTGGTTTTCGCTGCTTTCT-3'

*myod1*: F: 5'-AGGTCCAACACTGCTCCGACGGCATGAA-3'

R: 5'-AGGAGAGAATCCAGTTGATGGAAACA-3'
